# Supplementary material for: A network of mixed actin polarity in the leading edge of spreading cells
Source: Springer Nature journal article supplement (doi:10.1038/s42003-022-04288-7), 2022-12-07
Supplement: MOESM1 [file 42003_2022_4288_MOESM1_ESM.pdf]

## **A network of mixed actin polarity in the leading edge of spreading cells**

Wen-Lu Chung<sup>1</sup>, Matthias Eibauer<sup>1</sup>, Wenhong Li<sup>2</sup>, Rajaa Boujemaa-Paterski<sup>1</sup>, Benjamin Geiger<sup>2\*</sup> and Ohad Medalia<sup>1\*</sup>

<sup>1</sup> Department of Biochemistry, University of Zurich, Winterthurerstrasse 190, 8057 Zurich, Switzerland

<sup>2</sup> Department of Immunology, and regenerative Biology, Weizmann Institute of Science, Rehovot 76100, Israel

**Keywords:** actin, cytoskeletal organization, cell adhesion, cryo-ET, Galectin-8

\*Correspondence should be addressed to B.G. ([benny.geiger@weizmann.ac.il](mailto:benny.geiger@weizmann.ac.il)) and O.M. ([omedalia@bioc.uzh.ch](mailto:omedalia@bioc.uzh.ch))

## Supplementary information

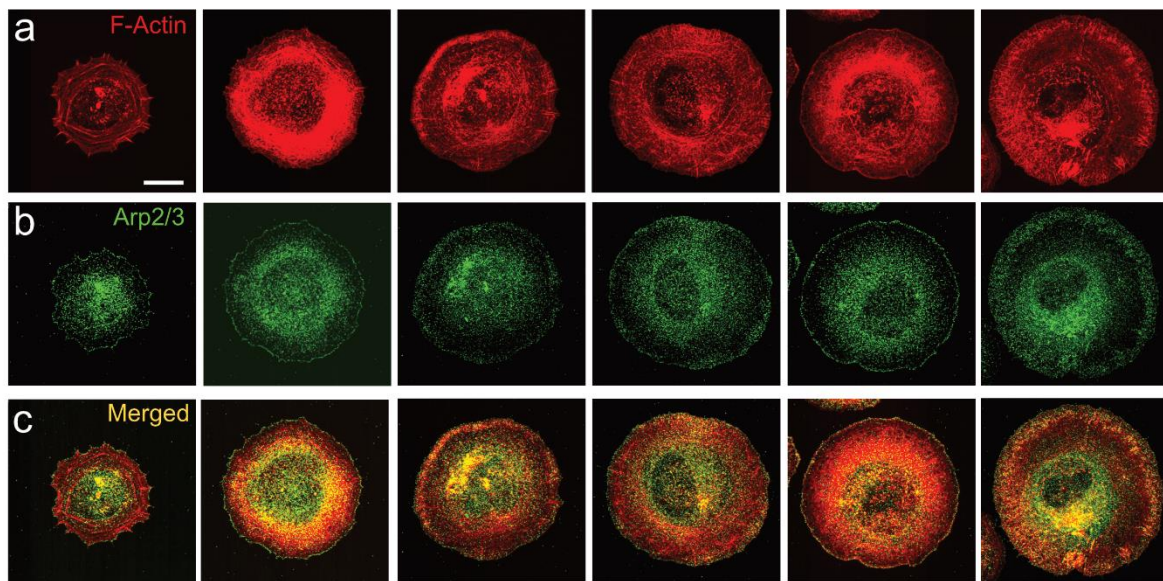

**Supplementary Fig. 1 Lamellipodia in cells, spreading on Galectin-8.** Immunofluorescent microscopy of MEFs spreading on Gal-8 coated substrate were acquired with spinning disk confocal microscopy. The Z-stack images were projected with ImageJ. The cells were chemically fixed 15 min after engaging to the Gal-8 coating glass. The six cells that are shown were stained with **a** phalloidin and **b** anti-p34-Arc. Merged color images are shown in **c**. Scale bar: 15  $\mu$ m

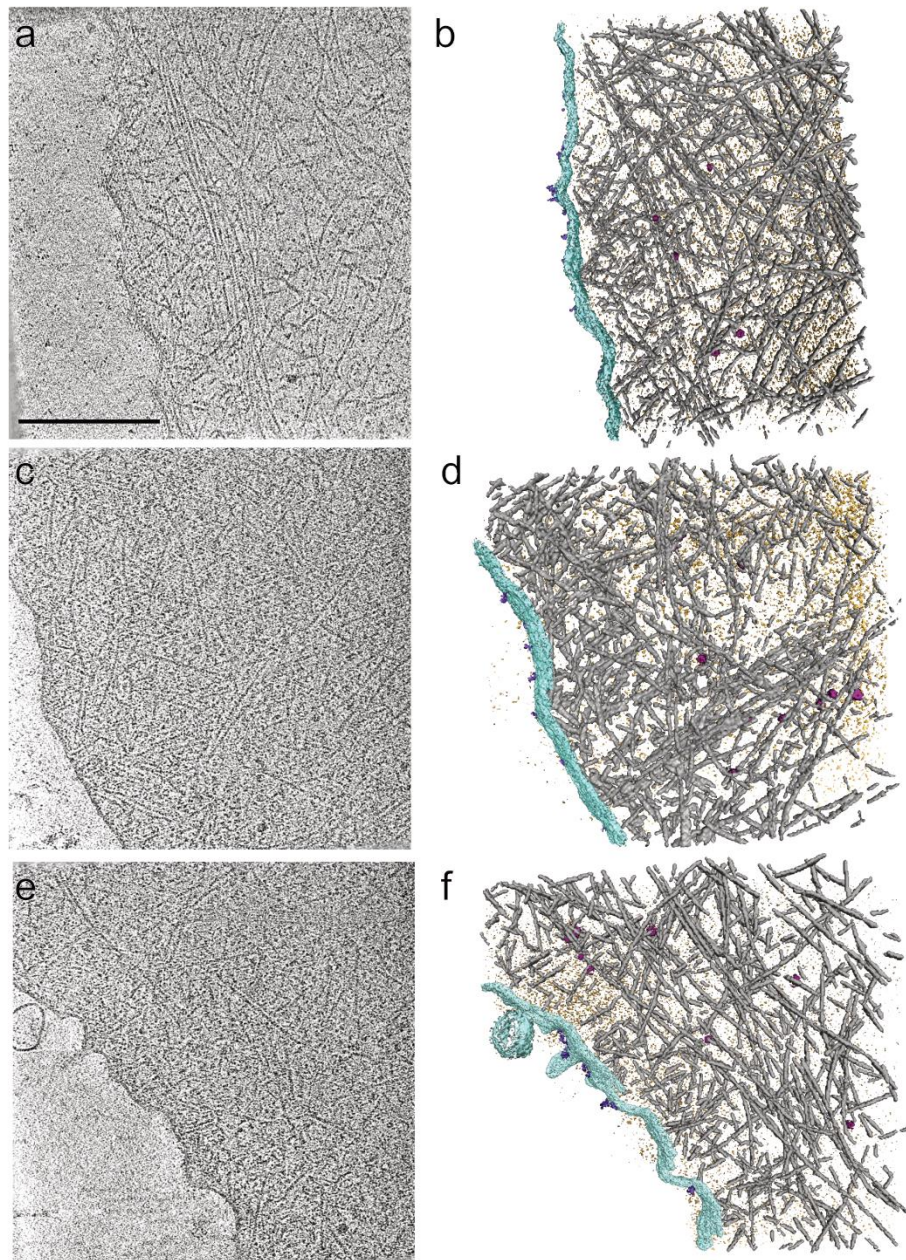

**Supplementary Fig. 2 Cryo-tomograms of lamellipodia of MEFs spread on Gal-8.** Cryo-tomograms of three cells are shown. x-y slices, 35.6 nm in thickness, through the tomograms **a**, **c**, **e** and the respective rendering isosurface views of the cryo-tomograms **b**, **d**, **f**. Actin filaments (gray), membrane (turquoise), receptors (purple) and macromolecular complexes (dark red) are shown. Scale bar: 300 nm



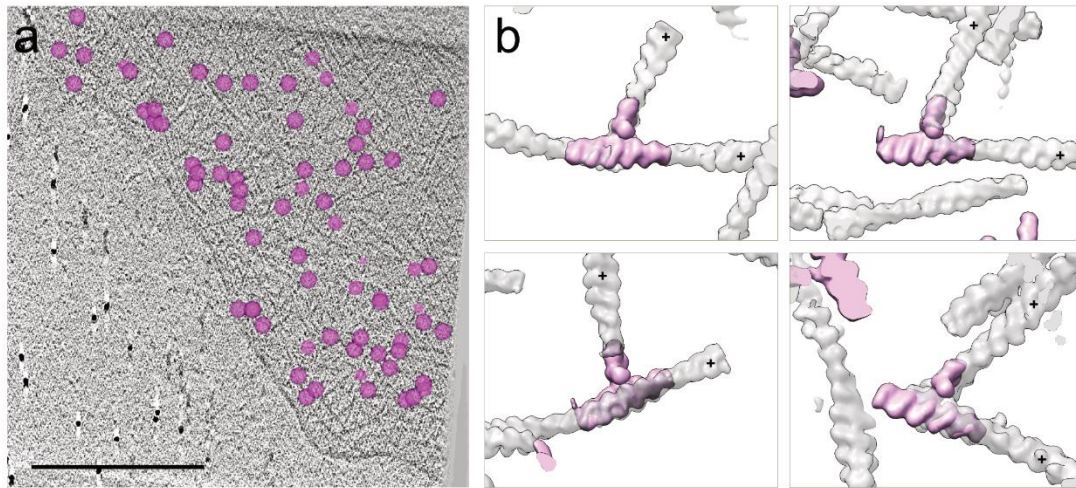

**Supplementary Fig. 3 The localization of Arp2/3 identified by template matching.** **a** The coordinates of the Arp2/3 (magenta) were superpositions on a 8.9 nm thick, x-y slice through the tomogram. Scale bar: 300 nm. **b** Surface rendered views of actin branches. Arp2/3 complexes are in magenta and actin filaments are in translucent gray. Barbed ends of daughter and mother filaments are marked with plus symbols.

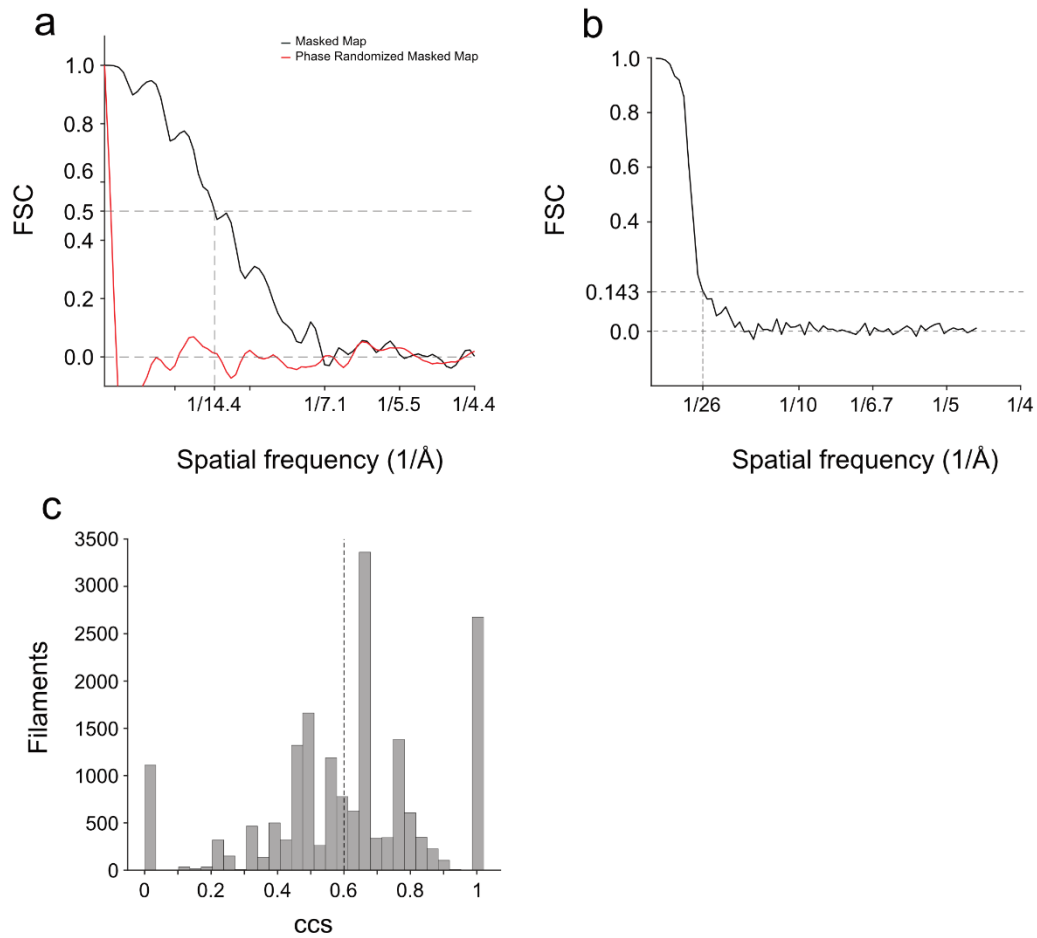

**Supplementary Fig. 4.** **a.** The refined actin structure in Fig. 2b and 2c shows spatial frequency of  $1/14.4 \text{ \AA}$  indicated by 0.5 of Fourier shell correlation to EMD-15106. **b.** The refined Arp2/3 structure in Fig. 2e shows spatial frequency of  $1/26 \text{ \AA}$  indicated by 0.143 gold-standard Fourier shell correlation criteria. **c.** Combined confidence score (ccs) of the acquired data described in method. ~70% of the filaments have passed the 0.6 ccs threshold (N = 47 tomograms).

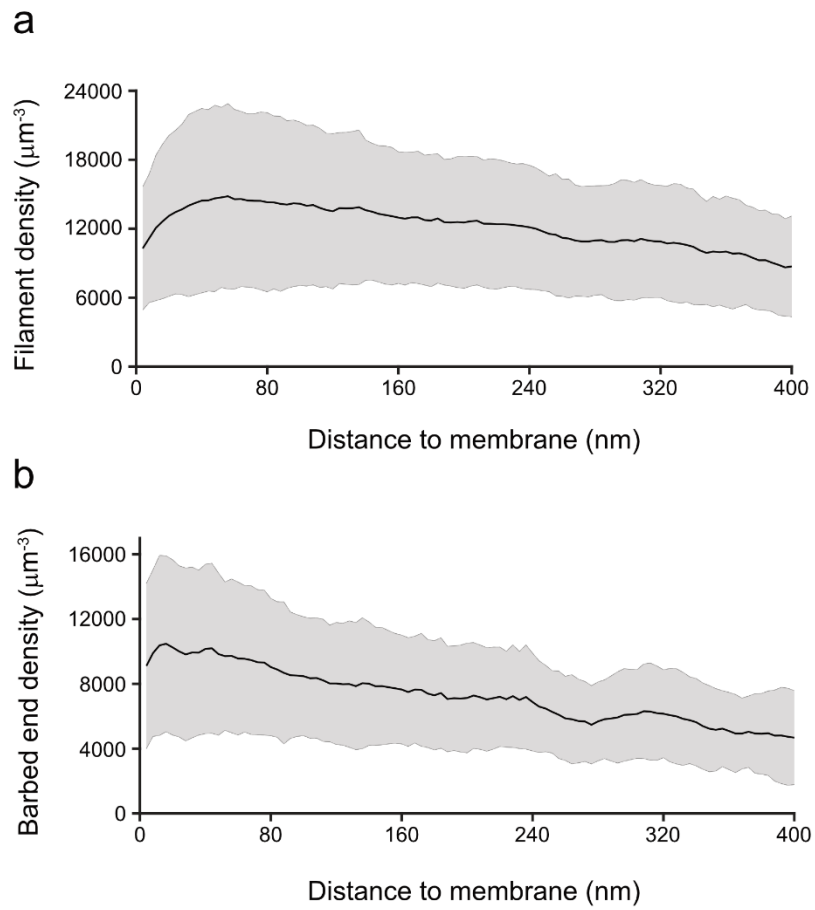

**Supplementary Fig. 5. a** Continuous filament density with shaded error bar of data standard deviation along the distance to the membrane ( $N = 38$  tomograms). **b** Continuous barbed end density with shaded error bar of data standard deviation along the distance to the membrane ( $N = 39$  tomograms).

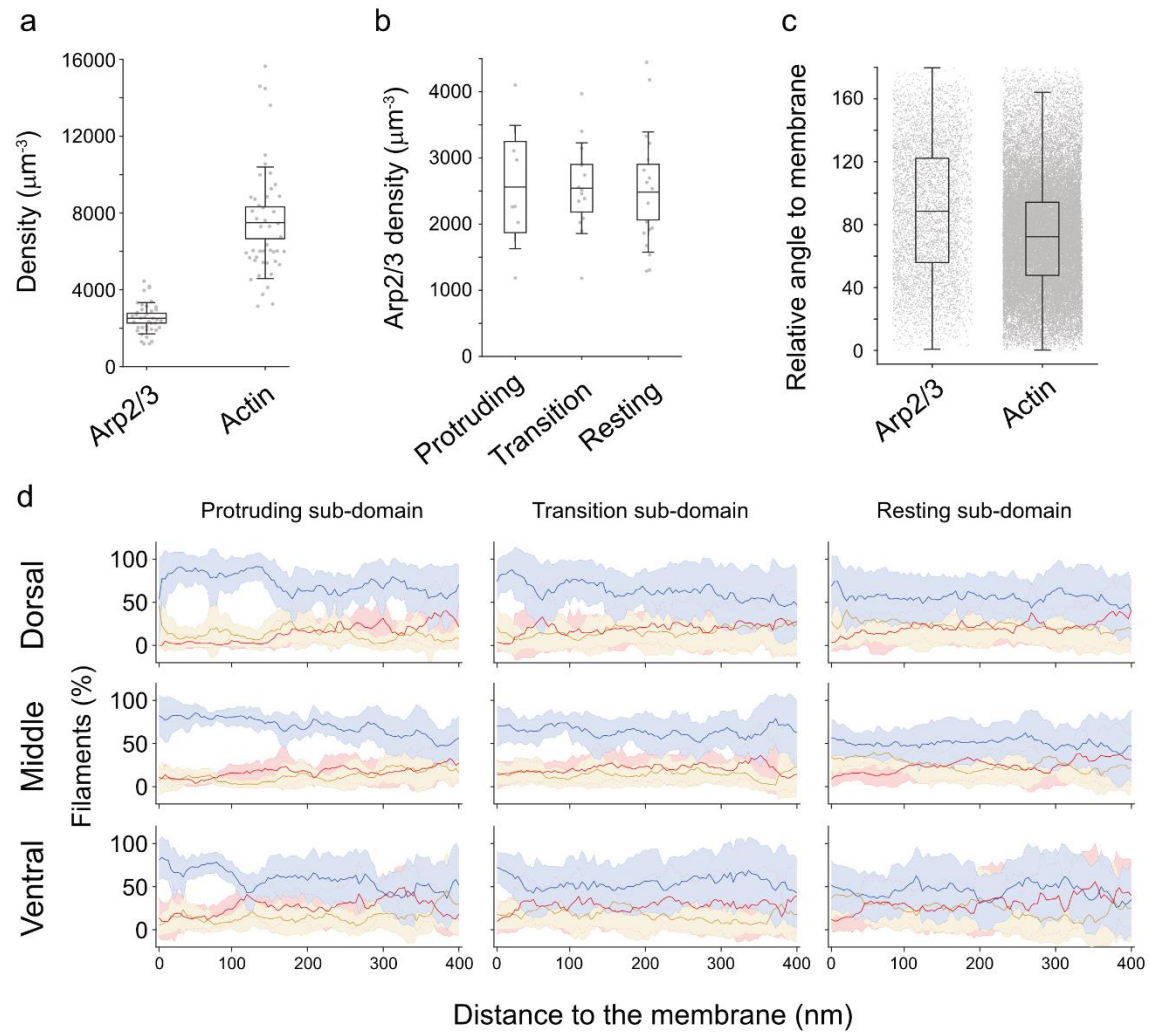

**Supplementary Fig. 6. a.** Boxplot shows the density of actin and Arp2/3 with 1 SD and 1.96 SEM in whiskers (N = 39, 47 tomograms, respectively). **b.** Boxplot shows the Arp2/3 density in three sub-domains with 1 SD and 1.96 SEM in whiskers (N = 7, 14, 18 tomograms, respectively). **c.** Boxplot shows the median and interquartile range of relative angle to membrane of actin filament and Arp2/3. Whiskers show the maximum and minimum. (N = 40 tomograms, Arp2/3 = 5630, Actin = 45104) **d.** The distribution of actin directionality along the thickness of the cell. The volumes were cut into three 30 nm sections, based on their proximity to the substrate (ventral: 0-30 nm, middle: 31-60 nm, and dorsal: 61-90 nm) and the polarity of actin filaments were drawn as a function of distance from the cell edge. Forward (blue), parallel (mustard), and backward (red) actin orientations are plotted as continuous line with a shaded error bar of data standard deviation, for protruding, transition, and resting sub-domains (N = 10, 16, 21 tomograms, respectively).

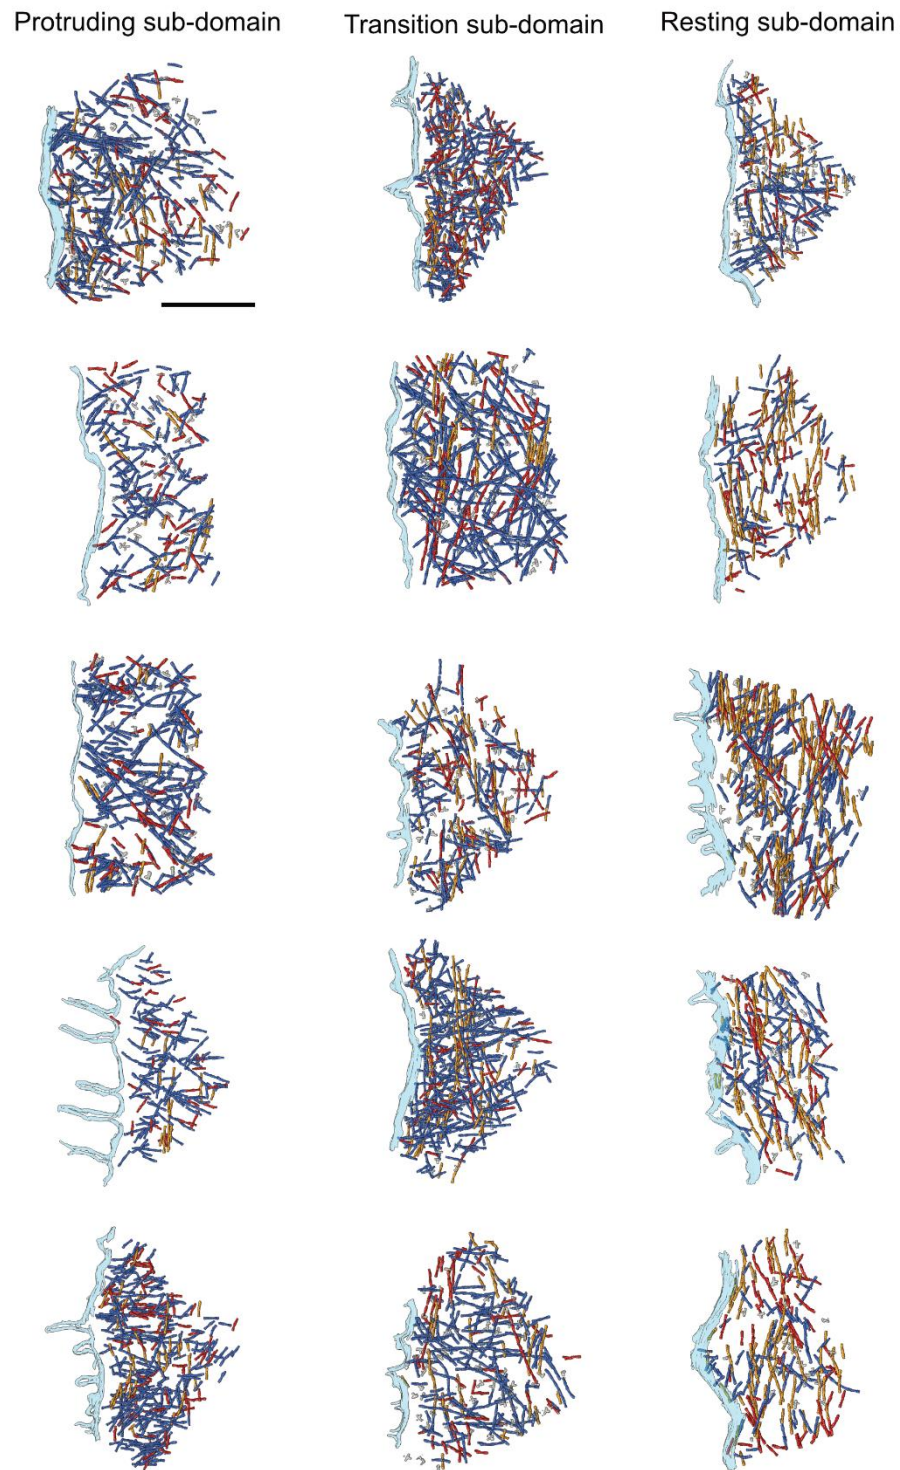

**Supplementary Fig. 7.** A collection of rendered tomograms, representing the 3 lamellipodial sub-domains. Arp2/3 are colored in gray. Scale bar: 300 nm



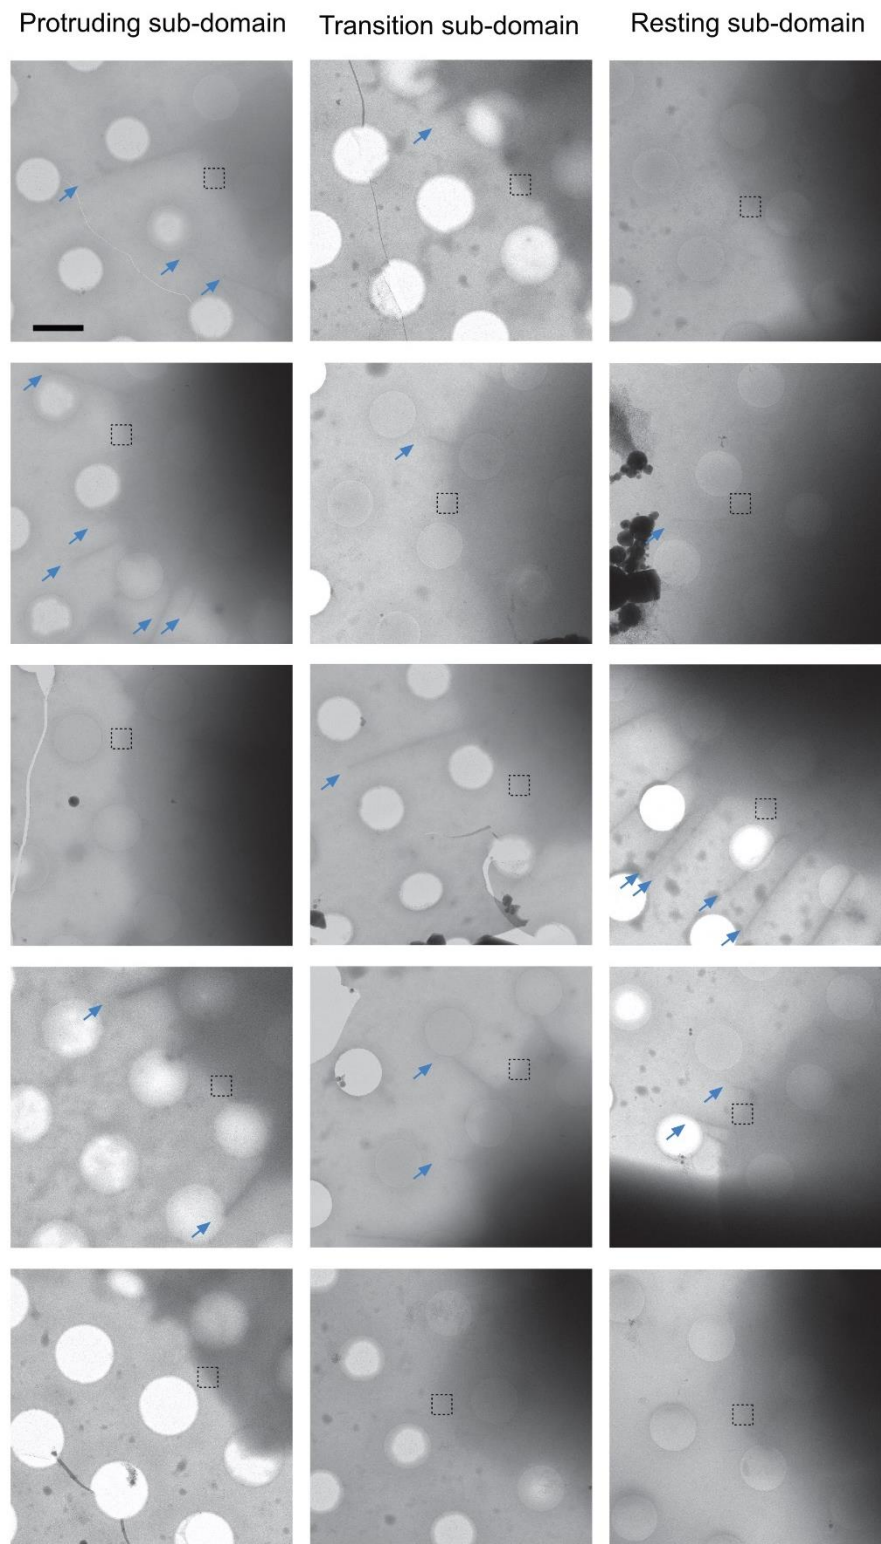

**Supplementary Fig. 8.** A collection of low magnification images of cell border. The box areas correlate to the data collected area in Supplementary Fig. 7. Filopodia are indicated with cyan arrows.

Scale bar: 2  $\mu$ m
